# Supplementary material for: Liensinine Inhibits Beige Adipocytes Recovering to white Adipocytes through Blocking Mitophagy Flux In Vitro and In Vivo
Source: MDPI journal article supplement (doi:10.3390/nu11071640), 2019-07-18
Supplement: s1 [file s1]

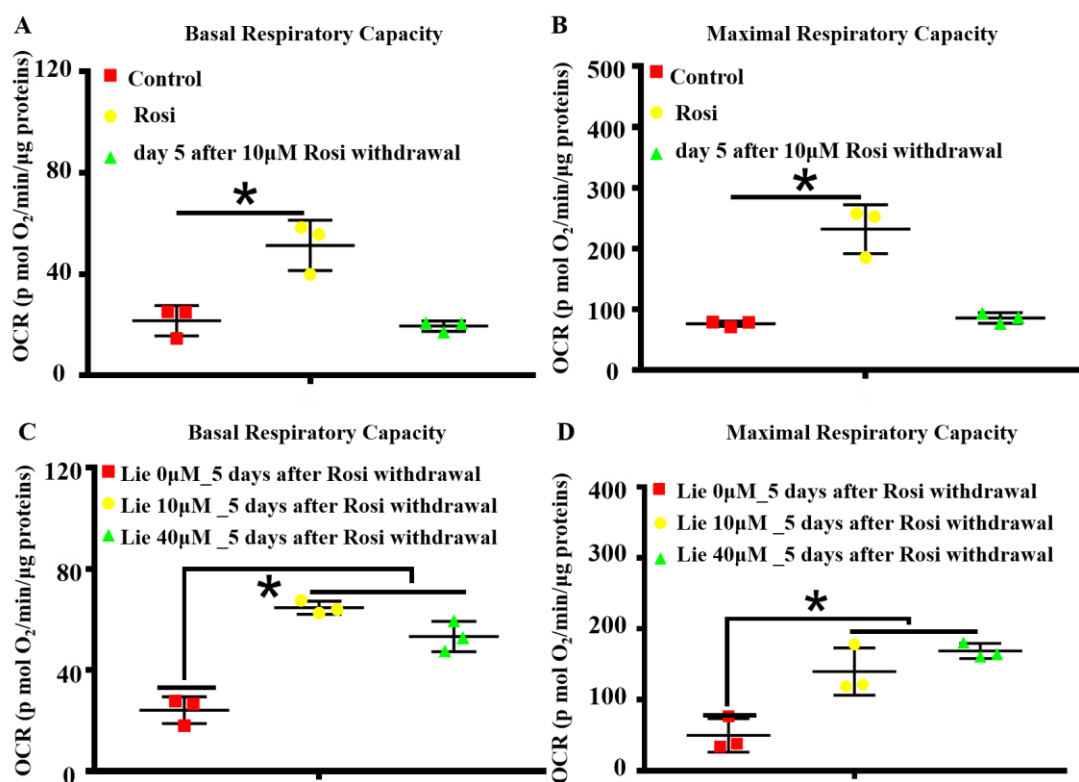

**Figure S1.** The basal oxygen consumption rate (OCR) (A) and the maximal OCR (B) in the control, beige adipocytes and beige adipocytes at day 5 following Rosi withdrawal. The basal OCR (C) and the maximal OCR (D) in Beige adipocytes exposed to various concentrations (0, 10 and 40 μM) of Lie for 5 days after Rosi withdrawal. The mitochondrial complex inhibitors were injected sequentially in the following order: oligomycin (1 μM), carbonyl cyanide p-trifluoromethoxyphenylhydrazone (FCCP) (0.75 μM), antimycin/rotenone (1 μM each).

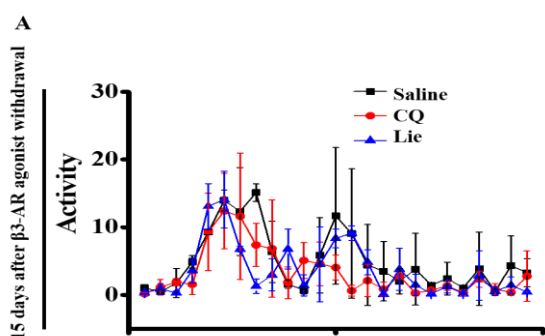

**Figure S2.** Spontaneous activity during a 12 h light-dark cycle was measured by Comprehensive Laboratory Animal Monitoring System (CLAMS). n=3/group Values shown are means ± standard deviation (SD).
